# Supplementary material
Source: publisher figshare collection journal article supplement (https://tandf.figshare.com/ndownloader/files/38558276)

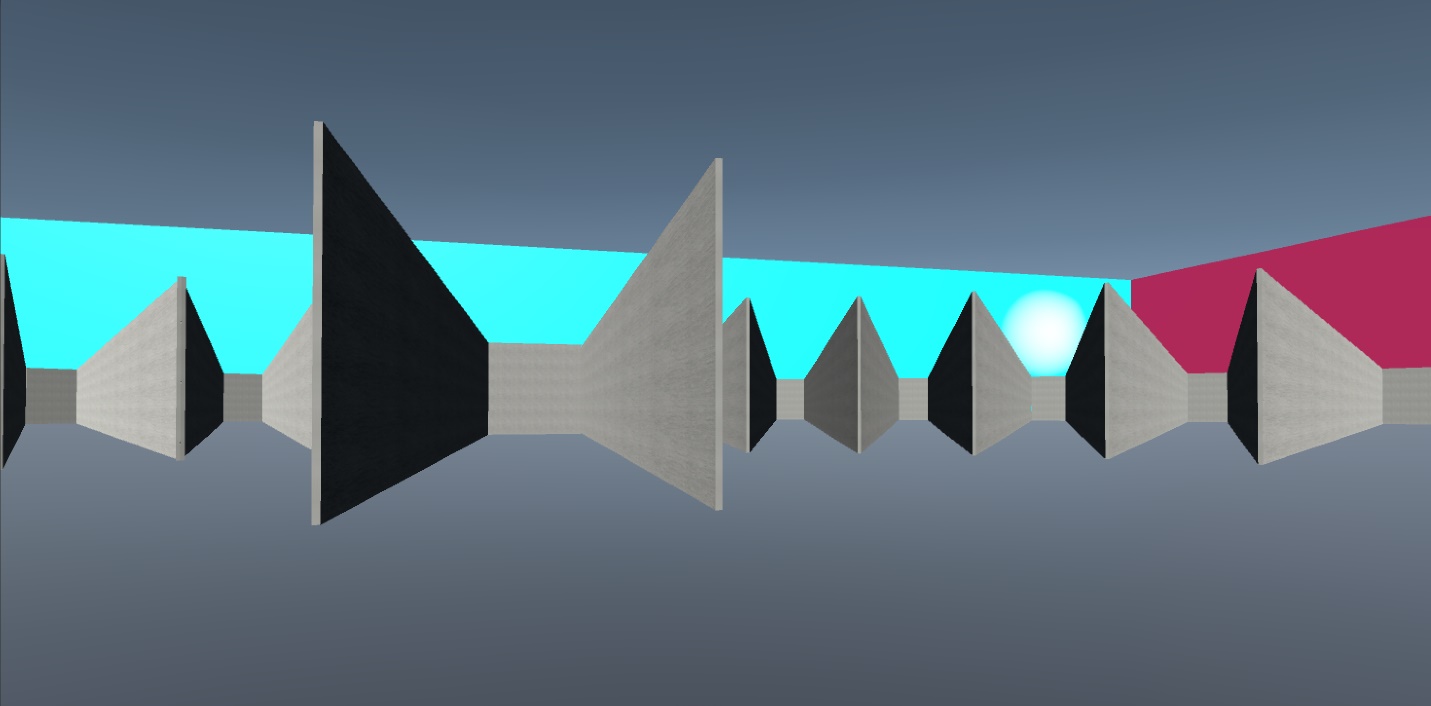


Supplemental 6: Test environment of Experiment 2 centered on Hallway CD.

Supplement: Supplementary file 1 [file 38558276]
